# Supplementary material for: Evaluating the efficiency of single-double atom catalysts in electrochemical NH3 production from NO based on CN monolayers
Source: Royal Society of Chemistry journal article supplement (doi:10.1039/d4ta01961j), 2024-01-01
Supplement: d4ta01961j1.pdf [file d4ta01961j1.pdf]

| system | binding energy |        | cohesive energy |
|--------|----------------|--------|-----------------|
|        | Sa-CN          | Da-CN  |                 |
| Sc     | -6.49          | -9.04  | -4.26           |
| Ti     | -6.00          | -10.87 | -5.54           |
| V      | -5.34          | -10.23 | -5.63           |
| Cr     | -3.53          | -5.78  | -4.067          |
| Mn     | -3.43          | -6.31  | -3.4            |
| Fe     | -3.79          | -7.24  | -4.79           |
| Co     | -3.92          | -7.80  | -5.11           |
| Ni     | -3.86          | -10.02 | -4.74           |
| Cu     | 0.49           | -5.31  | -3.55           |
| Zn     | -0.51          | -2.61  | -1.28           |
| Y      | -7.20          | -7.37  | -4.32           |
| Zr     | -7.53          | -11.00 | -6.53           |
| Nb     | -6.10          | -10.71 | -7.25           |
| Mo     | -4.45          | -9.68  | -6.58           |
| Ru     | -5.68          | -12.78 | -6.99           |
| Rh     | -4.83          | -10.29 | -6.03           |
| Pd     | -2.58          | -5.01  | -4.02           |
| Ag     | -2.00          | -1.90  | -2.99           |
| Cd     | -0.33          | 0.42   | -1.01           |
| Hf     | -7.11          | -10.30 | -6.57           |
| Ta     | -6.76          | -12.01 | -8.52           |
| W      | -5.17          | -10.59 | -8.73           |
| Re     | -3.96          | -10.37 | -8.08           |
| Os     | -4.89          | -11.84 | -8.1            |
| Ir     | -4.68          | -11.10 | -7.23           |
| Pt     | -3.39          | -7.91  | -5.65           |
| Au     | -1.30          | -1.32  | -3.47           |

FigS1.Binding energy of SACs and DACs versus transition metal own cohesion energy values

| SACs   |             |              |            |                       |
|--------|-------------|--------------|------------|-----------------------|
| system | N-end       | NO-side      | O-end      | Eads-H <sub>2</sub> O |
| Sc     | -2.12       | -1.82        | 0.98       | -0.78                 |
| Ti     | -3.21       | -2.79        | -1.67      | -0.84                 |
| Mn     | -2.25       | -1.68        | -0.94      | -1.07                 |
| Y      | -1.99       | -1.73        | -1.13      | -0.86                 |
| Zr     | -3.16       | -2.71        | -1.58      | -0.67                 |
| Hf     | -3.07       | -2.81        | -0.43      | -0.57                 |
|        |             |              |            |                       |
| DACs   |             |              |            |                       |
| system | Eads-end-no | Eads-side-no | Eads-O-end | Eads-H <sub>2</sub> O |
| Sc     | -6.28       | -6.29        | -5.17      | -2.16                 |
| Ti     | -5.33       | -5.37        | -5.72      | -0.58                 |
| V      | -3.02       | -3.53        | -2.89      | -0.19                 |
| Cr     | -3.91       | -3.91        | -0.36      | -0.62                 |
| Mn     | -2.70       | -2.69        | -0.45      | -0.46                 |
| Fe     | -3.46       | -2.53        | -1.27      | -0.25                 |
| Co     | -3.31       | -3.44        | -1.28      | -0.09                 |
| Ni     | -0.91       | -3.43        | -1.28      | -1.71                 |
| Cu     | -2.30       | -1.25        | -0.50      | -0.44                 |
| Zn     | -0.32       | -0.45        | 0.07       | -0.52                 |
|        |             |              |            |                       |
| Y      | -7.73       | -8.10        | -7.07      | -3.06                 |
| Zr     | -7.86       | -7.04        | -5.67      | -1.35                 |
| Nb     | -3.40       | -5.42        | -4.08      | -1.38                 |
| Mo     | -3.09       | -2.62        | -0.61      | -0.30                 |
| Ru     | -2.50       | -1.89        | -0.23      | -0.35                 |
| Rh     | -2.56       | -1.34        | -0.14      | -1.29                 |
| Pd     | -2.57       | -1.65        | 0.12       | -0.23                 |
|        |             |              |            |                       |
| Hf     | -7.32       | -7.32        | -5.77      | -2.71                 |
| Ta     | -5.41       | -8.94        | -6.98      | -2.04                 |
| W      | -5.26       | -7.31        | -2.82      | -2.01                 |
| Re     | -3.98       | -3.49        | -1.77      | -0.95                 |
| Os     | -2.74       | -2.04        | -0.43      | -0.40                 |
| Ir     | -2.64       | -1.31        | 0.10       | -0.28                 |
| Pt     | -2.58       | -1.94        | 0.41       | -0.23                 |

FigS2. The adsorption energy of NO at different sites and the adsorption energy of H<sub>2</sub>O

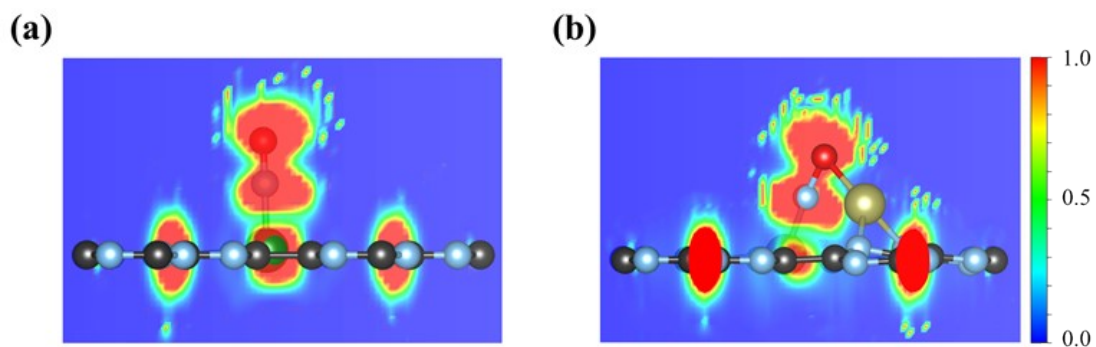

FigS3. Electronic localization function (ELF) of NO adsorbed on Zr-CN and Hf<sub>2</sub>-CN surfaces

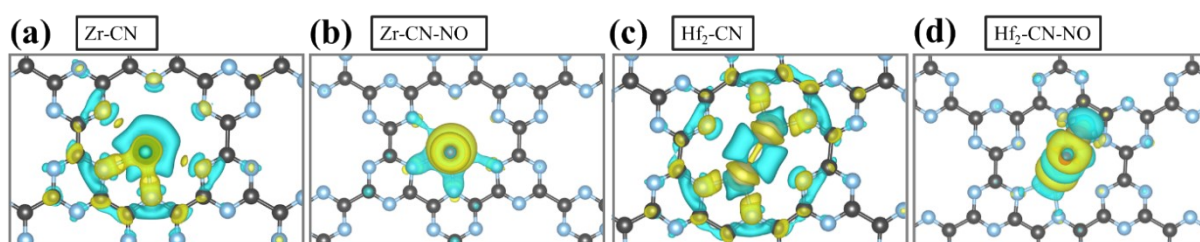

FigS4. Top views of the differential charges of Zr-CN, Zr-CN-NO, Hf<sub>2</sub>-CN, Hf<sub>2</sub>-CN-NO, with the yellow and cyan regions indicating charge accumulation and loss, respectively. The equivalent face value is set to 0.003 e Å<sup>-3</sup>.

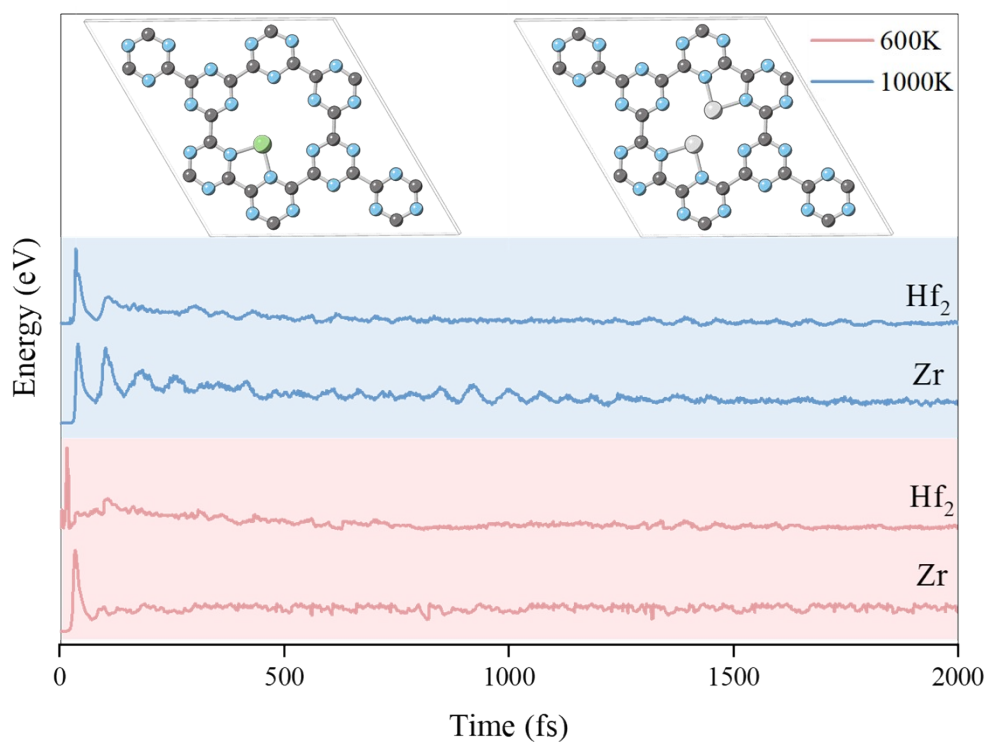

Fig.S5 The potential energy of Hf<sub>2</sub>-CN and Zr-CN at 600 K and 1000 K for 2000 fs.

Table S1 Fukui function values of Zr-CN and Hf<sub>2</sub>-CN

| Hf <sub>2</sub> -CN |          |          |           | Zr-CN          |        |          |          |           |                |
|---------------------|----------|----------|-----------|----------------|--------|----------|----------|-----------|----------------|
|                     | Fukui(+) | Fukui(0) | Fukui (-) | atomic charges |        | Fukui(+) | Fukui(0) | Fukui (-) | atomic charges |
| atom                | Mulliken | Mulliken | Mulliken  |                | atom   | Mulliken | Mulliken | Mulliken  |                |
| N (1)               | 0.012    | 0.014    | 0.015     | -0.141         | N (1)  | 0.016    | 0.016    | 0.015     | -0.222         |
| N (2)               | 0.016    | 0.008    | 0         | -0.748         | N (2)  | 0.024    | 0.013    | 0.002     | -0.74          |
| N (3)               | 0.015    | 0.016    | 0.016     | -0.154         | N (3)  | 0.018    | 0.019    | 0.02      | -0.224         |
| N (4)               | 0.013    | 0.014    | 0.015     | -0.142         | N (4)  | 0.016    | 0.016    | 0.016     | -0.222         |
| N (5)               | 0.014    | 0.015    | 0.015     | -0.155         | N (5)  | 0.018    | 0.019    | 0.02      | -0.224         |
| N (6)               | 0.015    | 0.007    | -0.001    | -0.745         | N (6)  | 0.024    | 0.013    | 0.003     | -0.741         |
| N (7)               | 0.012    | 0.012    | 0.012     | -0.21          | N (7)  | 0.018    | 0.021    | 0.023     | -0.264         |
| N (8)               | 0.013    | 0.012    | 0.012     | -0.218         | N (8)  | 0.015    | 0.014    | 0.013     | -0.263         |
| N (9)               | 0.014    | 0.013    | 0.012     | -0.222         | N (9)  | 0.017    | 0.019    | 0.02      | -0.268         |
| N (10)              | 0.014    | 0.009    | 0.004     | -0.556         | N (10) | 0.017    | 0.016    | 0.014     | -0.529         |
| N (11)              | 0.011    | 0.012    | 0.012     | -0.158         | N (11) | 0.013    | 0.013    | 0.013     | -0.228         |
| N (12)              | 0.015    | 0.015    | 0.014     | -0.166         | N (12) | 0.017    | 0.017    | 0.017     | -0.243         |
| N (13)              | 0.015    | 0.009    | 0.002     | -0.555         | N (13) | 0.018    | 0.016    | 0.013     | -0.534         |
| N (14)              | 0.013    | 0.013    | 0.013     | -0.166         | N (14) | 0.017    | 0.017    | 0.017     | -0.243         |
| N (15)              | 0.012    | 0.012    | 0.012     | -0.158         | N (15) | 0.013    | 0.013    | 0.013     | -0.228         |
| N (16)              | 0.012    | 0.012    | 0.012     | -0.21          | N (16) | 0.018    | 0.021    | 0.023     | -0.264         |
| N (17)              | 0.014    | 0.013    | 0.013     | -0.22          | N (17) | 0.017    | 0.019    | 0.02      | -0.268         |
| N (18)              | 0.013    | 0.013    | 0.013     | -0.22          | N (18) | 0.015    | 0.014    | 0.013     | -0.263         |
| N (19)              | 0.014    | 0.015    | 0.015     | -0.15          | N (19) | 0.009    | 0.009    | 0.009     | -0.231         |
| N (20)              | 0.013    | 0.014    | 0.014     | -0.147         | N (20) | 0.012    | 0.012    | 0.012     | -0.234         |
| N (21)              | 0.016    | 0.007    | -0.002    | -0.743         | N (21) | 0.004    | 0.005    | 0.006     | -0.378         |
| N (22)              | 0.014    | 0.014    | 0.015     | -0.15          | N (22) | 0.009    | 0.009    | 0.009     | -0.231         |
| N (23)              | 0.018    | 0.008    | -0.002    | -0.745         | N (23) | 0.004    | 0.005    | 0.006     | -0.38          |
| N (24)              | 0.013    | 0.014    | 0.014     | -0.146         | N (24) | 0.013    | 0.013    | 0.013     | -0.234         |
| C (25)              | 0.018    | 0.02     | 0.023     | 0.227          | C (25) | 0.015    | 0.021    | 0.026     | 0.311          |
| C (26)              | 0.016    | 0.013    | 0.01      | 0.237          | C (26) | 0.013    | 0.017    | 0.021     | 0.33           |
| C (27)              | 0.028    | 0.027    | 0.026     | 0.12           | C (27) | 0.025    | 0.028    | 0.03      | 0.2            |
| C (28)              | 0.026    | 0.026    | 0.025     | 0.121          | C (28) | 0.025    | 0.028    | 0.03      | 0.2            |
| C (29)              | 0.016    | 0.013    | 0.01      | 0.237          | C (29) | 0.013    | 0.017    | 0.021     | 0.329          |
| C (30)              | 0.017    | 0.019    | 0.021     | 0.229          | C (30) | 0.015    | 0.02     | 0.026     | 0.31           |
| C (31)              | 0.017    | 0.016    | 0.016     | 0.179          | C (31) | 0.02     | 0.02     | 0.02      | 0.241          |
| C (32)              | 0.015    | 0.016    | 0.017     | 0.163          | C (32) | 0.019    | 0.02     | 0.02      | 0.232          |
| C (33)              | 0.016    | 0.016    | 0.016     | 0.179          | C (33) | 0.018    | 0.019    | 0.019     | 0.232          |
| C (34)              | 0.026    | 0.021    | 0.017     | 0.211          | C (34) | 0.019    | 0.023    | 0.026     | 0.304          |
| C (35)              | 0.037    | 0.029    | 0.022     | 0.164          | C (35) | 0.026    | 0.029    | 0.032     | 0.231          |
| C (36)              | 0.02     | 0.018    | 0.016     | 0.213          | C (36) | 0.018    | 0.021    | 0.024     | 0.286          |
| C (37)              | 0.021    | 0.018    | 0.015     | 0.214          | C (37) | 0.018    | 0.021    | 0.024     | 0.288          |
| C (38)              | 0.037    | 0.029    | 0.021     | 0.164          | C (38) | 0.026    | 0.029    | 0.033     | 0.231          |
| C (39)              | 0.024    | 0.02     | 0.016     | 0.211          | C (39) | 0.019    | 0.023    | 0.027     | 0.304          |
| C (40)              | 0.016    | 0.016    | 0.016     | 0.178          | C (40) | 0.018    | 0.019    | 0.019     | 0.233          |
| C (41)              | 0.015    | 0.016    | 0.017     | 0.163          | C (41) | 0.019    | 0.02     | 0.02      | 0.232          |
| C (42)              | 0.016    | 0.016    | 0.016     | 0.18           | C (42) | 0.02     | 0.02     | 0.02      | 0.24           |
| C (43)              | 0.026    | 0.026    | 0.025     | 0.123          | C (43) | 0.019    | 0.019    | 0.02      | 0.244          |
| C (44)              | 0.019    | 0.015    | 0.01      | 0.238          | C (44) | 0.016    | 0.017    | 0.017     | 0.265          |
| C (45)              | 0.015    | 0.018    | 0.02      | 0.235          | C (45) | 0.017    | 0.018    | 0.019     | 0.264          |
| C (46)              | 0.015    | 0.017    | 0.02      | 0.233          | C (46) | 0.017    | 0.018    | 0.02      | 0.265          |
| C (47)              | 0.02     | 0.015    | 0.01      | 0.236          | C (47) | 0.016    | 0.017    | 0.018     | 0.265          |
| C (48)              | 0.029    | 0.027    | 0.024     | 0.124          | C (48) | 0.019    | 0.019    | 0.02      | 0.243          |
| Hf(49)              | 0.078    | 0.119    | 0.161     | 1.278          | Zr(49) | 0.187    | 0.152    | 0.117     | 1.475          |
| Hf(50)              | 0.086    | 0.123    | 0.16      | 1.269          |        |          |          |           |                |

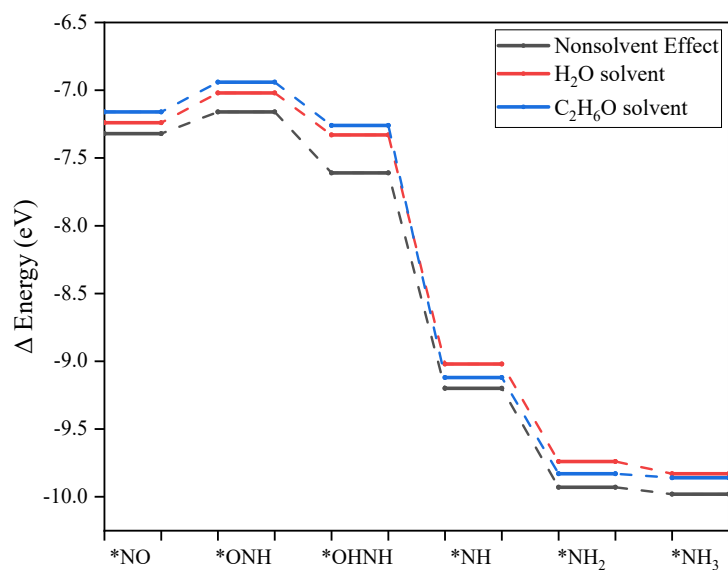

Fig.S6 Stepwise reduction of NO to NH<sub>3</sub> on Hf<sub>2</sub>-CN without using solvent.

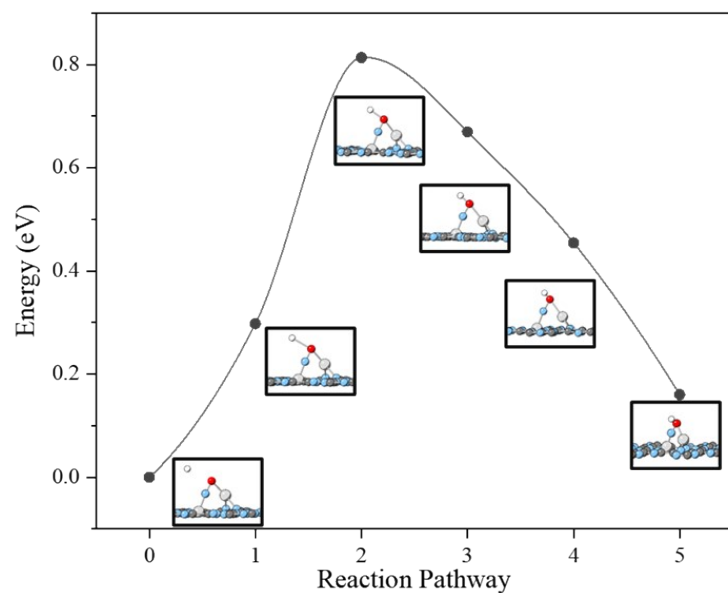

FigS7: Transition state diagram for the NO hydrogenation reaction on Hf<sub>2</sub>-CN.

Table S2 Formation energy of Hf<sub>2</sub>-CN in different solvents

|                      | Hf <sub>2</sub> -CN | CN      | Gaverage | Formative energy |
|----------------------|---------------------|---------|----------|------------------|
| CH <sub>3</sub> COOH | -427.45             | -406.55 | -10.30   | -0.31            |
| Ethanol              | -427.20             | -406.34 | -10.30   | -0.26            |
| H <sub>2</sub> O     | -428.95             | -407.77 | -10.30   | -0.59            |
